# Supplementary material
Source: Springer Nature journal article supplement (https://www.springermedizin.de/resource/supplementary/12936_2011_1930_MOESM5_ESM.pdf/9542076)
Supplement: MOESM5 [file 9542076]

**Step 1:** Find *Best* model

*Best* model is defined as the model with the smallest AIC or  $RSS_{\text{shared}}$  among fitted models, where appropriate.

**Step 2:** Identify *possibly convex* models

*Possibly convex* models are quadratic or cubic models with negative concavity somewhere over the time domain.

**Step 3:** If model is NOT *possibly convex*:

$K = -b_1$ ;  $t_{\text{lag}}=0$ ; GO TO **Step 5**

**Step 4:** If model is *possibly convex*

- 4.1 For each log-parasitaemia predicted by the *Best* model  $y_i$  (but excluding any measured zero parasitaemias), calculate slope  $S_i$  between this point and the preceding predicted value
- 4.2 Find the most negative slope,  $S_{\text{max}}$
- 4.3 Calculate normalised slopes  $S_n = S / S_{\text{max}}$
- 4.4 Find clearance rate constant using the chart below

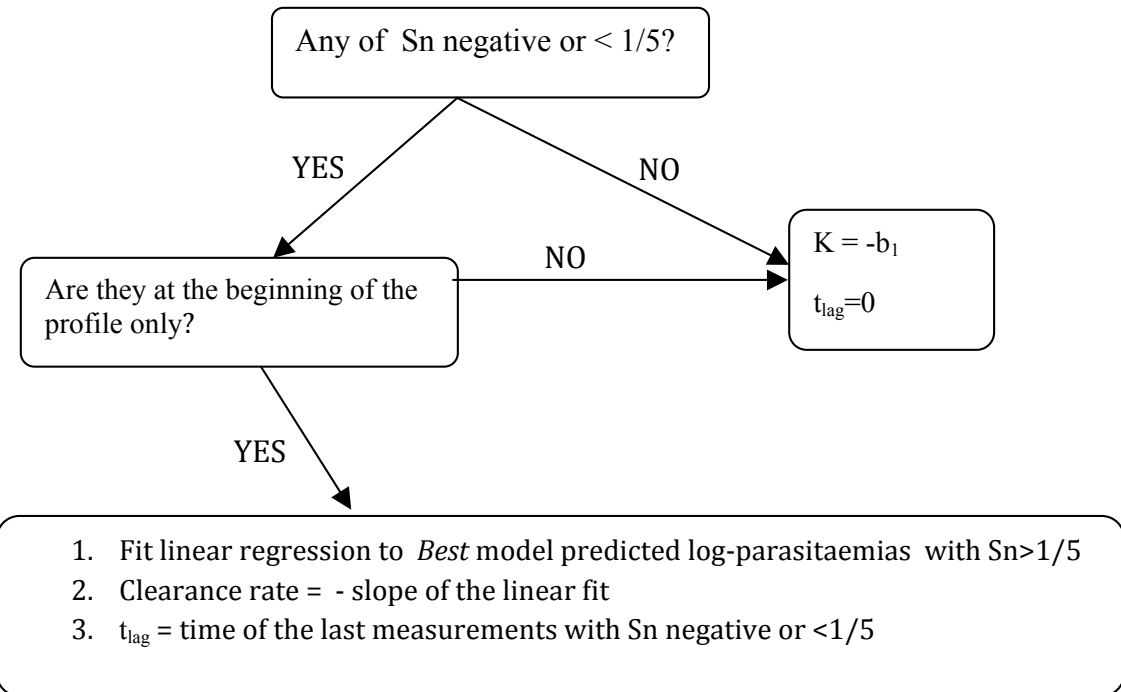

**Step 5:** END
